# Supplementary material for: Sodium tanshinone IIA sulfate adjunct therapy reduces high-sensitivity C-reactive protein level in coronary artery disease patients: a randomized controlled trial
Source: PubMed Central journal article supplement (PMC5727111; doi:10.1038/s41598-017-16980-4), 2017-12-12
Supplement: 41598_2017_16980_MOESM1_ESM.pdf [file 41598_2017_16980_MOESM1_ESM.pdf]

**Sodium tanshinone IIA sulfate adjunct therapy reduces high-sensitivity C-reactive protein level in coronary artery disease patients: a randomized controlled trial**

**Siming Li<sup>1,+</sup>, Yang Jiao<sup>1,2,+</sup>, Hanjay Wang<sup>3</sup>, Qinghua Shang<sup>1</sup>, Fang Lu<sup>4</sup>, Li Huang<sup>5</sup>, Jiangang Liu<sup>1</sup>, Hao Xu<sup>1\*</sup>, Keji Chen<sup>1</sup>**

<sup>1</sup> Cardiovascular Diseases Center, Xiyuan Hospital, China Academy of Chinese Medical Sciences, Beijing 100091, China.

<sup>2</sup> Graduate School, Beijing University of Chinese Medicine, Beijing 100029, China.

<sup>3</sup> Department of Cardiothoracic Surgery, Stanford University, Palo Alto, CA 94304, USA.

<sup>4</sup> Institute of Clinical Pharmacology, Xiyuan Hospital, China Academy of Chinese Medical Sciences, Beijing 100091, China.

<sup>5</sup> Integrative Cardiology Department, China-Japan Friendship Hospital, Beijing 100029, China.

\*Correspondence should be addressed to Hao Xu, xuhaotcm@hotmail.com.

+ These authors contributed equally to this work.

Supplement Table 1. Calculation of angina risk score

---

|                                                                                          |          |
|------------------------------------------------------------------------------------------|----------|
| <b>Angina Frequency</b>                                                                  |          |
| <1 episode per week                                                                      | 0 points |
| 1-6 episodes per week                                                                    | 2 points |
| 1-3 episodes per day                                                                     | 4 points |
| >4 episodes per day                                                                      | 6 points |
| <b>Angina Duration, per episode</b>                                                      |          |
| No angina                                                                                | 0 points |
| ≤5 minutes                                                                               | 2 points |
| Between 5-10 minutes                                                                     | 4 points |
| ≥10 minutes                                                                              | 6 points |
| <b>Angina Intensity</b>                                                                  |          |
| No angina                                                                                | 0 points |
| Relieved with rest. Does not affect daily life.                                          | 2 points |
| Relieved with medication. Can endure moderate exercise.                                  | 4 points |
| Angina frequently induced with activities of daily life (e.g. dressing, eating, walking) | 6 points |
| <b>Nitroglycerin usage</b>                                                               |          |
| <1 pill per week                                                                         | 0 points |
| 1-4 pills per week                                                                       | 2 points |
| 5-9 pills per week                                                                       | 4 points |
| ≥10 pills per week                                                                       | 6 points |

---

Total angina score equals the sum of the component scores. Minimum score = 0 points. Maximum score = 24 points.
